# Supplementary material
Source: publisher site journal article supplement (https://www.dovepress.com/article/90926)
Supplement: Supplementary file 1 [file get_supplementary_file.php]

|                | 180         |              | 199         |              | 191         |
|----------------|-------------|--------------|-------------|--------------|-------------|
| <b>control</b> | ALBU_HUMAN  | <b>gold1</b> | ALBU_HUMAN  | <b>gold2</b> | ALBU_HUMAN  |
|                | A2MG_HUMAN  |              | A2MG_HUMAN  |              | A2MG_HUMAN  |
|                | CO3_HUMAN   |              | IGHG1_HUMAN |              | IGHG1_HUMAN |
|                | TRFE_HUMAN  |              | CO3_HUMAN   |              | CO3_HUMAN   |
|                | IGHG1_HUMAN |              | APOB_HUMAN  |              | IGHG2_HUMAN |
|                | CO4B_HUMAN  |              | TRFE_HUMAN  |              | TRFE_HUMAN  |
|                | CO4A_HUMAN  |              | IGHG2_HUMAN |              | APOB_HUMAN  |
|                | APOB_HUMAN  |              | IGKC_HUMAN  |              | CO4B_HUMAN  |
|                | A1AT_HUMAN  |              | CO4B_HUMAN  |              | A1AT_HUMAN  |
|                | IGKC_HUMAN  |              | CO4A_HUMAN  |              | CO4A_HUMAN  |
|                | IGHG2_HUMAN |              | A1AT_HUMAN  |              | APOA1_HUMAN |
|                | APOA1_HUMAN |              | CERU_HUMAN  |              | CERU_HUMAN  |
|                | IGHG3_HUMAN |              | IGHG4_HUMAN |              | CFAH_HUMAN  |
|                | IGHG4_HUMAN |              | HPT_HUMAN   |              | IGKC_HUMAN  |
|                | IGHA1_HUMAN |              | HEMO_HUMAN  |              | IGHG3_HUMAN |
|                | CERU_HUMAN  |              | CFAH_HUMAN  |              | VTDB_HUMAN  |
|                | CFAH_HUMAN  |              | IGHG3_HUMAN |              | IGHG4_HUMAN |
|                | IGHA2_HUMAN |              | APOA1_HUMAN |              | HPT_HUMAN   |
|                | IGHM_HUMAN  |              | VTDB_HUMAN  |              | HEMO_HUMAN  |
|                | HPT_HUMAN   |              | IGHM_HUMAN  |              | AACT_HUMAN  |
|                | VTDB_HUMAN  |              | IGHA1_HUMAN |              | IGHA1_HUMAN |
|                | HEMO_HUMAN  |              | K1C10_HUMAN |              | LAC2_HUMAN  |
|                | THRB_HUMAN  |              | MUCB_HUMAN  |              | IGLL5_HUMAN |
|                | ITIH1_HUMAN |              | HPTR_HUMAN  |              | THRB_HUMAN  |
|                | IGLL5_HUMAN |              | ITIH4_HUMAN |              | IGHM_HUMAN  |
|                | LAC2_HUMAN  |              | AACT_HUMAN  |              | ITIH4_HUMAN |
|                | MUCB_HUMAN  |              | PLMN_HUMAN  |              | ITIH1_HUMAN |
|                | APOA4_HUMAN |              | THRB_HUMAN  |              | PLMN_HUMAN  |
|                | ITIH4_HUMAN |              | IGLL5_HUMAN |              | APOA4_HUMAN |
|                | AACT_HUMAN  |              | LAC2_HUMAN  |              | MUCB_HUMAN  |
|                | K2C1_HUMAN  |              | IGHA2_HUMAN |              | FETUA_HUMAN |
|                | KNG1_HUMAN  |              | ITIH1_HUMAN |              | ITIH2_HUMAN |
|                | FETUA_HUMAN |              | A1BG_HUMAN  |              | APOH_HUMAN  |
|                | PLMN_HUMAN  |              | FETUA_HUMAN |              | IGHA2_HUMAN |
|                | APOH_HUMAN  |              | ITIH2_HUMAN |              | KNG1_HUMAN  |
|                | HPTR_HUMAN  |              | K1C9_HUMAN  |              | K1C10_HUMAN |
|                | CFAB_HUMAN  |              | CFAB_HUMAN  |              | HPTR_HUMAN  |
|                | A1BG_HUMAN  |              | APOA4_HUMAN |              | K2C1_HUMAN  |
|                | ITIH2_HUMAN |              | K2C1_HUMAN  |              | A1BG_HUMAN  |
|                | APOE_HUMAN  |              | APOA2_HUMAN |              | APOE_HUMAN  |

|             |             |             |
|-------------|-------------|-------------|
| K1C9_HUMAN  | FINC_HUMAN  | CFAB_HUMAN  |
| LAC7_HUMAN  | CO5_HUMAN   | LAC7_HUMAN  |
| HRG_HUMAN   | APOH_HUMAN  | APOA2_HUMAN |
| IC1_HUMAN   | IC1_HUMAN   | CO5_HUMAN   |
| CO5_HUMAN   | GELS_HUMAN  | IC1_HUMAN   |
| GELS_HUMAN  | A1AG1_HUMAN | HRG_HUMAN   |
| K1C10_HUMAN | LAC7_HUMAN  | PON1_HUMAN  |
| APOA2_HUMAN | HRG_HUMAN   | FINC_HUMAN  |
| C4BPA_HUMAN | KNG1_HUMAN  | C4BPA_HUMAN |
| FINC_HUMAN  | C4BPA_HUMAN | A1AG1_HUMAN |
| HBB_HUMAN   | PON1_HUMAN  | ANGT_HUMAN  |
| ANGT_HUMAN  | PGRP2_HUMAN | K1C9_HUMAN  |
| CO7_HUMAN   | APOE_HUMAN  | GELS_HUMAN  |
| A1AG1_HUMAN | ANT3_HUMAN  | AFAM_HUMAN  |
| ANT3_HUMAN  | K22E_HUMAN  | ANT3_HUMAN  |
| CLUS_HUMAN  | ANGT_HUMAN  | AMBP_HUMAN  |
| AMBP_HUMAN  | AMBP_HUMAN  | CBG_HUMAN   |
| PON1_HUMAN  | CO7_HUMAN   | A2AP_HUMAN  |
| K22E_HUMAN  | HBB_HUMAN   | CLUS_HUMAN  |
| CO9_HUMAN   | HEP2_HUMAN  | RET4_HUMAN  |
| A2AP_HUMAN  | A2AP_HUMAN  | HEP2_HUMAN  |
| HBA_HUMAN   | AFAM_HUMAN  | CO7_HUMAN   |
| A1AG2_HUMAN | HBA_HUMAN   | HBB_HUMAN   |
| CD5L_HUMAN  | CD5L_HUMAN  | APOD_HUMAN  |
| KV302_HUMAN | CBG_HUMAN   | C1QB_HUMAN  |
| VTNC_HUMAN  | ZA2G_HUMAN  | APOC3_HUMAN |
| AFAM_HUMAN  | VTNC_HUMAN  | PGRP2_HUMAN |
| KV305_HUMAN | PEDF_HUMAN  | KV307_HUMAN |
| KV307_HUMAN | KAIN_HUMAN  | KV302_HUMAN |
| PGRP2_HUMAN | KV302_HUMAN | A1AG2_HUMAN |
| APOD_HUMAN  | A2GL_HUMAN  | A2GL_HUMAN  |
| C1QB_HUMAN  | PROS_HUMAN  | ZA2G_HUMAN  |
| LUM_HUMAN   | CLUS_HUMAN  | C1R_HUMAN   |
| HV305_HUMAN | LUM_HUMAN   | CO8B_HUMAN  |
| APOC3_HUMAN | C1R_HUMAN   | VTNC_HUMAN  |
| RET4_HUMAN  | C1S_HUMAN   | KAIN_HUMAN  |
| CO8B_HUMAN  | KV301_HUMAN | HV305_HUMAN |
| C1R_HUMAN   | A1AG2_HUMAN | C1S_HUMAN   |
| CBG_HUMAN   | CO9_HUMAN   | HBA_HUMAN   |
| CO8G_HUMAN  | CO6_HUMAN   | CFAI_HUMAN  |
| HBD_HUMAN   | KV101_HUMAN | CXCL7_HUMAN |

|             |             |             |
|-------------|-------------|-------------|
| CFAI_HUMAN  | CFAI_HUMAN  | LUM_HUMAN   |
| KV301_HUMAN | RET4_HUMAN  | PROS_HUMAN  |
| CXCL7_HUMAN | TTHY_HUMAN  | CO9_HUMAN   |
| C1S_HUMAN   | APOL1_HUMAN | C1QC_HUMAN  |
| ZA2G_HUMAN  | APOD_HUMAN  | KV312_HUMAN |
| HV303_HUMAN | C1QB_HUMAN  | CPN2_HUMAN  |
| HEP2_HUMAN  | CO8B_HUMAN  | LV302_HUMAN |
| HV209_HUMAN | CPN2_HUMAN  | KV301_HUMAN |
| KV204_HUMAN | SAA4_HUMAN  | K1H1_HUMAN  |
| HV301_HUMAN | CXCL7_HUMAN | CD5L_HUMAN  |
| LV302_HUMAN | APOC3_HUMAN | K22E_HUMAN  |
| A2GL_HUMAN  | C1QC_HUMAN  | PEDF_HUMAN  |
| KLKB1_HUMAN | KLKB1_HUMAN | APOC2_HUMAN |
| KV312_HUMAN | HV305_HUMAN | KLKB1_HUMAN |
| HV318_HUMAN | HV209_HUMAN | HV303_HUMAN |
| CO8A_HUMAN  | APOC2_HUMAN | KV101_HUMAN |
| HV320_HUMAN | CO8G_HUMAN  | CO8G_HUMAN  |
| C1QC_HUMAN  | KV121_HUMAN | KV402_HUMAN |
| IGJ_HUMAN   | ATRN_HUMAN  | TTHY_HUMAN  |
| APOC2_HUMAN | KV118_HUMAN | APOL1_HUMAN |
| KV402_HUMAN | FHR1_HUMAN  | KV121_HUMAN |
| KV106_HUMAN | CO8A_HUMAN  | K1C17_HUMAN |
| KV121_HUMAN | KV402_HUMAN | K2C6A_HUMAN |
| KV101_HUMAN | K1C14_HUMAN | CO2_HUMAN   |
| TTHY_HUMAN  | KV104_HUMAN | HV320_HUMAN |
| KV203_HUMAN | KV106_HUMAN | K1C16_HUMAN |
| HV307_HUMAN | LV302_HUMAN | HV301_HUMAN |
| CO2_HUMAN   | IGJ_HUMAN   | K2C5_HUMAN  |
| FHR1_HUMAN  | KV203_HUMAN | HV209_HUMAN |
| PEDF_HUMAN  | K1C16_HUMAN | ATRN_HUMAN  |
| KV303_HUMAN | HV318_HUMAN | KV204_HUMAN |
| SAA4_HUMAN  | HV303_HUMAN | K2C8_HUMAN  |
| KAIN_HUMAN  | KV312_HUMAN | CO8A_HUMAN  |
| LG3BP_HUMAN | APOM_HUMAN  | LG3BP_HUMAN |
| FCN3_HUMAN  | K2C6A_HUMAN | KV303_HUMAN |
| ALS_HUMAN   | KV110_HUMAN | C1QA_HUMAN  |
| PROS_HUMAN  | ALS_HUMAN   | SAA4_HUMAN  |
| KV118_HUMAN | CO2_HUMAN   | KRT82_HUMAN |
| KV119_HUMAN | KV204_HUMAN | IGJ_HUMAN   |
| ATRN_HUMAN  | HV309_HUMAN | FA12_HUMAN  |
| LV106_HUMAN | HV301_HUMAN | KV106_HUMAN |

|             |             |             |
|-------------|-------------|-------------|
| KV122_HUMAN | KV308_HUMAN | LV106_HUMAN |
| APOC1_HUMAN | KV119_HUMAN | FCN3_HUMAN  |
| C1QA_HUMAN  | LV403_HUMAN | KV118_HUMAN |
| KV120_HUMAN | APOC1_HUMAN | APOM_HUMAN  |
| K1C14_HUMAN | TSP1_HUMAN  | SAA1_HUMAN  |
| KV206_HUMAN | LV301_HUMAN | HV304_HUMAN |
| PHLD_HUMAN  | FA12_HUMAN  | KV203_HUMAN |
| CPN2_HUMAN  | APOA_HUMAN  | KV122_HUMAN |
| K2C5_HUMAN  | KV201_HUMAN | ZPI_HUMAN   |
| TSP1_HUMAN  | TETN_HUMAN  | CO6_HUMAN   |
| HV103_HUMAN | LBP_HUMAN   | KV119_HUMAN |
| HV102_HUMAN | LV604_HUMAN | HV306_HUMAN |
| THBG_HUMAN  | ADIPO_HUMAN | HV318_HUMAN |
| CO6_HUMAN   | LV106_HUMAN | HV308_HUMAN |
| APOL1_HUMAN | SAA1_HUMAN  | FHR1_HUMAN  |
| HV308_HUMAN | FETUB_HUMAN | SAA2_HUMAN  |
| FA12_HUMAN  | ZPI_HUMAN   | H2B1B_HUMAN |
| SEPP1_HUMAN | HV320_HUMAN | LBP_HUMAN   |
| LV102_HUMAN | FCN3_HUMAN  | APOC1_HUMAN |
| KV309_HUMAN | HABP2_HUMAN | KRT83_HUMAN |
| CBPB2_HUMAN | KV309_HUMAN | KV309_HUMAN |
| HV306_HUMAN | C1QA_HUMAN  | KV104_HUMAN |
| ZPI_HUMAN   | FA5_HUMAN   | SEPP1_HUMAN |
| C1RL_HUMAN  | PHLD_HUMAN  | THBG_HUMAN  |
| LBP_HUMAN   | SEPP1_HUMAN | FIBA_HUMAN  |
| PF4V_HUMAN  | F13B_HUMAN  | H4_HUMAN    |
| FHR2_HUMAN  | CBPB2_HUMAN | PF4V_HUMAN  |
| HV101_HUMAN | ACTB_HUMAN  | KV310_HUMAN |
| LV301_HUMAN | FA10_HUMAN  | ALS_HUMAN   |
| SAA1_HUMAN  | CBPN_HUMAN  | HABP2_HUMAN |
| KV110_HUMAN | THBG_HUMAN  | GPX3_HUMAN  |
| ADIPO_HUMAN | HV319_HUMAN | HV302_HUMAN |
| KV310_HUMAN | HV302_HUMAN | C1RL_HUMAN  |
| ITIH3_HUMAN | HV308_HUMAN | PIGR_HUMAN  |
| FETUB_HUMAN | ITIH3_HUMAN | TSP1_HUMAN  |
| HV302_HUMAN | LG3BP_HUMAN | KV120_HUMAN |
| HV319_HUMAN | KV122_HUMAN | HV101_HUMAN |
| LV105_HUMAN | APOF_HUMAN  | KRT37_HUMAN |
| LV403_HUMAN | HV102_HUMAN | PRG4_HUMAN  |
| APOM_HUMAN  | KV306_HUMAN | LV301_HUMAN |
| FBLN1_HUMAN | HV103_HUMAN | PHLD_HUMAN  |

|             |             |             |
|-------------|-------------|-------------|
| LV103_HUMAN | LV105_HUMAN | ACTB_HUMAN  |
| LV001_HUMAN | DCD_HUMAN   | CBPB2_HUMAN |
| C4BPB_HUMAN | HV306_HUMAN | VWF_HUMAN   |
| HABP2_HUMAN | PF4V_HUMAN  | IPSP_HUMAN  |
| FIBA_HUMAN  | LYSC_HUMAN  | ALDOB_HUMAN |
| SHBG_HUMAN  | CRIS3_HUMAN | HV103_HUMAN |
| CBPN_HUMAN  | CD14_HUMAN  | C4BPB_HUMAN |
| HV201_HUMAN | LV001_HUMAN | LV105_HUMAN |
| BTD_HUMAN   | KV111_HUMAN | LV001_HUMAN |
| HV206_HUMAN | IV4F8_HUMAN | LV103_HUMAN |
| GPX3_HUMAN  | FBLN1_HUMAN | KV110_HUMAN |
| HV202_HUMAN | LV405_HUMAN | ITIH3_HUMAN |
| TETN_HUMAN  | VWF_HUMAN   | FA5_HUMAN   |
| FAK2_HUMAN  | T2EA_HUMAN  | LRC15_HUMAN |
| KRT81_HUMAN | LYVE1_HUMAN | HV102_HUMAN |
| IKKB_HUMAN  | FA11_HUMAN  | H2A1B_HUMAN |
| ACTA_HUMAN  | LV103_HUMAN | KIF5C_HUMAN |
|             | CAH1_HUMAN  | APOF_HUMAN  |
|             | PROC_HUMAN  | TBA1A_HUMAN |
|             | CHLE_HUMAN  | PROC_HUMAN  |
|             | FA9_HUMAN   | F13B_HUMAN  |
|             | FIBA_HUMAN  | CBPN_HUMAN  |
|             | CYTF_HUMAN  | PLAK_HUMAN  |
|             | HV206_HUMAN | FETUB_HUMAN |
|             | CASPE_HUMAN | DCXR_HUMAN  |
|             | CNDP1_HUMAN | KV206_HUMAN |
|             | PRG4_HUMAN  | CCD89_HUMAN |
|             | SHAN1_HUMAN | BCAP_HUMAN  |
|             | HV201_HUMAN |             |
|             | FAK2_HUMAN  |             |
|             | HGFA_HUMAN  |             |
|             | REV1_HUMAN  |             |
|             | CFAD_HUMAN  |             |
|             | KV405_HUMAN |             |
|             | NDEL1_HUMAN |             |
|             | LV104_HUMAN |             |

|              | 186         |              | 176         |
|--------------|-------------|--------------|-------------|
| <b>gold3</b> | ALBU_HUMAN  | <b>gold4</b> | ALBU_HUMAN  |
|              | A2MG_HUMAN  |              | A2MG_HUMAN  |
|              | CO3_HUMAN   |              | CO3_HUMAN   |
|              | TRFE_HUMAN  |              | TRFE_HUMAN  |
|              | APOB_HUMAN  |              | APOB_HUMAN  |
|              | IGHG1_HUMAN |              | CO4B_HUMAN  |
|              | CO4B_HUMAN  |              | CO4A_HUMAN  |
|              | CO4A_HUMAN  |              | IGHG1_HUMAN |
|              | APOA1_HUMAN |              | IGKC_HUMAN  |
|              | IGHG2_HUMAN |              | APOA1_HUMAN |
|              | A1AT_HUMAN  |              | IGHA1_HUMAN |
|              | IGKC_HUMAN  |              | A1AT_HUMAN  |
|              | IGHG3_HUMAN |              | CFAH_HUMAN  |
|              | CFAH_HUMAN  |              | CERU_HUMAN  |
|              | K2C1_HUMAN  |              | IGHG3_HUMAN |
|              | IGHG4_HUMAN |              | IGHA2_HUMAN |
|              | K1C10_HUMAN |              | IGHG4_HUMAN |
|              | CERU_HUMAN  |              | IGHG2_HUMAN |
|              | K1C9_HUMAN  |              | VTDB_HUMAN  |
|              | HPT_HUMAN   |              | HEMO_HUMAN  |
|              | HEMO_HUMAN  |              | HPT_HUMAN   |
|              | VTDB_HUMAN  |              | K1C10_HUMAN |
|              | FINC_HUMAN  |              | K2C1_HUMAN  |
|              | THRB_HUMAN  |              | THRB_HUMAN  |
|              | IGHA1_HUMAN |              | IGHM_HUMAN  |
|              | IGHM_HUMAN  |              | ITIH4_HUMAN |
|              | ITIH1_HUMAN |              | ITIH1_HUMAN |
|              | PLMN_HUMAN  |              | APOA4_HUMAN |
|              | K22E_HUMAN  |              | PLMN_HUMAN  |
|              | ITIH4_HUMAN |              | K1C9_HUMAN  |
|              | LAC2_HUMAN  |              | IGLL5_HUMAN |
|              | IGLL5_HUMAN |              | APOH_HUMAN  |
|              | AACT_HUMAN  |              | LAC2_HUMAN  |
|              | IGHA2_HUMAN |              | ITIH2_HUMAN |
|              | APOA4_HUMAN |              | MUCB_HUMAN  |
|              | MUCB_HUMAN  |              | AACT_HUMAN  |
|              | ITIH2_HUMAN |              | FINC_HUMAN  |
|              | HPTR_HUMAN  |              | A1BG_HUMAN  |
|              | C4BPA_HUMAN |              | HPTR_HUMAN  |
|              | CFAB_HUMAN  |              | KNG1_HUMAN  |

|             |             |
|-------------|-------------|
| A1BG_HUMAN  | APOE_HUMAN  |
| KNG1_HUMAN  | FETUA_HUMAN |
| FETUA_HUMAN | K22E_HUMAN  |
| CO5_HUMAN   | HBB_HUMAN   |
| CO7_HUMAN   | CO5_HUMAN   |
| APOH_HUMAN  | CFAB_HUMAN  |
| LAC7_HUMAN  | C4BPA_HUMAN |
| HBB_HUMAN   | IC1_HUMAN   |
| IC1_HUMAN   | CLUS_HUMAN  |
| A1AG1_HUMAN | AMBP_HUMAN  |
| HRG_HUMAN   | CO7_HUMAN   |
| APOE_HUMAN  | GELS_HUMAN  |
| PON1_HUMAN  | ANGT_HUMAN  |
| ANGT_HUMAN  | A1AG1_HUMAN |
| ANT3_HUMAN  | APOD_HUMAN  |
| APOA2_HUMAN | HBA_HUMAN   |
| AMBP_HUMAN  | A2GL_HUMAN  |
| A1AG2_HUMAN | KV101_HUMAN |
| AFAM_HUMAN  | APOA2_HUMAN |
| ZA2G_HUMAN  | KV118_HUMAN |
| CLUS_HUMAN  | KV105_HUMAN |
| C1R_HUMAN   | ANT3_HUMAN  |
| GELS_HUMAN  | PON1_HUMAN  |
| A2AP_HUMAN  | HBD_HUMAN   |
| K1C14_HUMAN | CO9_HUMAN   |
| APOC3_HUMAN | HRG_HUMAN   |
| KV302_HUMAN | AFAM_HUMAN  |
| KV307_HUMAN | A2AP_HUMAN  |
| HBA_HUMAN   | KV305_HUMAN |
| K2C5_HUMAN  | KV302_HUMAN |
| CFAI_HUMAN  | ZA2G_HUMAN  |
| VTNC_HUMAN  | C1QB_HUMAN  |
| C1QB_HUMAN  | RET4_HUMAN  |
| C1S_HUMAN   | APOC3_HUMAN |
| KV301_HUMAN | VTNC_HUMAN  |
| CO8B_HUMAN  | PGRP2_HUMAN |
| CXCL7_HUMAN | CXCL7_HUMAN |
| CO8G_HUMAN  | HV305_HUMAN |
| KLKB1_HUMAN | CO8G_HUMAN  |
| PGRP2_HUMAN | KV312_HUMAN |
| PEDF_HUMAN  | CD5L_HUMAN  |

|             |             |
|-------------|-------------|
| CO9_HUMAN   | CO8A_HUMAN  |
| RET4_HUMAN  | C1R_HUMAN   |
| HEP2_HUMAN  | KLKB1_HUMAN |
| HV303_HUMAN | A1AG2_HUMAN |
| APOD_HUMAN  | C1S_HUMAN   |
| K1C16_HUMAN | CO8B_HUMAN  |
| HV320_HUMAN | FHR1_HUMAN  |
| A2GL_HUMAN  | KV301_HUMAN |
| LV302_HUMAN | LV302_HUMAN |
| K2C6A_HUMAN | HV303_HUMAN |
| HV304_HUMAN | CBG_HUMAN   |
| HV318_HUMAN | K1C16_HUMAN |
| APOC2_HUMAN | CO2_HUMAN   |
| HV305_HUMAN | C1QC_HUMAN  |
| KV121_HUMAN | HV209_HUMAN |
| CBG_HUMAN   | HEP2_HUMAN  |
| KAIN_HUMAN  | HV318_HUMAN |
| LUM_HUMAN   | KV106_HUMAN |
| KV204_HUMAN | K2C6B_HUMAN |
| KV101_HUMAN | KV402_HUMAN |
| K1C17_HUMAN | KAIN_HUMAN  |
| C1QC_HUMAN  | K1C14_HUMAN |
| CO2_HUMAN   | KV303_HUMAN |
| CPN2_HUMAN  | CFAI_HUMAN  |
| CD5L_HUMAN  | PEDF_HUMAN  |
| KV402_HUMAN | K2C5_HUMAN  |
| CO8A_HUMAN  | K2C6A_HUMAN |
| ALS_HUMAN   | CPN2_HUMAN  |
| FCN3_HUMAN  | HV301_HUMAN |
| FHR1_HUMAN  | SAA4_HUMAN  |
| HV209_HUMAN | APOM_HUMAN  |
| KV312_HUMAN | HV320_HUMAN |
| TTHY_HUMAN  | IGJ_HUMAN   |
| FA12_HUMAN  | LUM_HUMAN   |
| PROS_HUMAN  | APOC1_HUMAN |
| KV303_HUMAN | KV204_HUMAN |
| ATRN_HUMAN  | TTHY_HUMAN  |
| CO6_HUMAN   | KV119_HUMAN |
| KV203_HUMAN | LBP_HUMAN   |
| KV106_HUMAN | FCN3_HUMAN  |
| IGJ_HUMAN   | KV122_HUMAN |



|             |             |
|-------------|-------------|
| HV301_HUMAN | FA12_HUMAN  |
| HV102_HUMAN | PROS_HUMAN  |
| DCD_HUMAN   | KV203_HUMAN |
| APOC1_HUMAN | LV106_HUMAN |
| HV306_HUMAN | APOL1_HUMAN |
| KV118_HUMAN | ATRN_HUMAN  |
| APOL1_HUMAN | APOC2_HUMAN |
| SAA4_HUMAN  | KV310_HUMAN |
| KV105_HUMAN | KV309_HUMAN |
| KV104_HUMAN | PF4V_HUMAN  |
| KV309_HUMAN | HV101_HUMAN |
| LV106_HUMAN | KV110_HUMAN |
| KV119_HUMAN | ITIH3_HUMAN |
| TSP1_HUMAN  | GPX3_HUMAN  |
| KV122_HUMAN | HV103_HUMAN |
| PF4V_HUMAN  | PHLD_HUMAN  |
| KV120_HUMAN | CBPB2_HUMAN |
| APOA_HUMAN  | ALS_HUMAN   |
| KV110_HUMAN | APOA_HUMAN  |
| ZPI_HUMAN   | HV102_HUMAN |
| HV103_HUMAN | KV120_HUMAN |
| THBG_HUMAN  | C1RL_HUMAN  |
| SAA1_HUMAN  | HABP2_HUMAN |
| LV301_HUMAN | C1QA_HUMAN  |
| APOM_HUMAN  | THBG_HUMAN  |
| GPX3_HUMAN  | SEPP1_HUMAN |
| C1QA_HUMAN  | LV403_HUMAN |
| LV102_HUMAN | ZPI_HUMAN   |
| LG3BP_HUMAN | PRG4_HUMAN  |
| PHLD_HUMAN  | HV306_HUMAN |
| HV101_HUMAN | CO6_HUMAN   |
| FHR2_HUMAN  | LV301_HUMAN |
| CBPB2_HUMAN | BTD_HUMAN   |
| ITIH3_HUMAN | FHR2_HUMAN  |
| IGHD_HUMAN  | ADIPO_HUMAN |
| HV308_HUMAN | FBLN1_HUMAN |
| C4BPB_HUMAN | HV308_HUMAN |
| C1RL_HUMAN  | C4BPB_HUMAN |
| SEPP1_HUMAN | LV001_HUMAN |
| ADIPO_HUMAN | CJ090_HUMAN |
| HABP2_HUMAN | LV105_HUMAN |

|             |             |
|-------------|-------------|
| PIP_HUMAN   | HV206_HUMAN |
| HORN_HUMAN  | SAA1_HUMAN  |
| HV206_HUMAN | HV201_HUMAN |
| LV103_HUMAN | TETN_HUMAN  |
| LV403_HUMAN | CYTF_HUMAN  |
| LBP_HUMAN   | FAK2_HUMAN  |
| FIBA_HUMAN  | BGH3_HUMAN  |
| CHLE_HUMAN  | CBPN_HUMAN  |
| LV001_HUMAN | ACTA_HUMAN  |
| PROC_HUMAN  | IKKB_HUMAN  |
| APOF_HUMAN  | FA5_HUMAN   |
| LYSC_HUMAN  | REV1_HUMAN  |
| ACTB_HUMAN  | LAMA2_HUMAN |
| KV112_HUMAN |             |
| PRG4_HUMAN  |             |
| CBPN_HUMAN  |             |
| LV105_HUMAN |             |
| H4_HUMAN    |             |
| FBLN1_HUMAN |             |
| VWF_HUMAN   |             |
| BCAP_HUMAN  |             |
| TETN_HUMAN  |             |
| KV202_HUMAN |             |
